# Supplementary material for: Succession and Diversity of Microbial Flora during the Fermentation of Douchi and Their Effects on the Formation of Characteristic Aroma
Source: MDPI journal article supplement (doi:10.3390/foods12020329), 2023-01-10
Supplement: s1 [file s1]

**Table S1.** Difference in alpha diversity of microbial community during Yangfan *Douchi* fermentation

| Sam-<br>ple | Diversity index |       |               |       |               |       | Abundance index |       |          |         |
|-------------|-----------------|-------|---------------|-------|---------------|-------|-----------------|-------|----------|---------|
|             | Shannon         |       | Simpson       |       | Chao1         |       | Ace             |       | Coverage |         |
|             | Bacte-<br>ria   | Fungi | Bacte-<br>ria | Fungi | Bacte-<br>ria | Fungi | Bacteria        | Fungi | Bacteria | Fungi   |
| D0-1        | 2.23            | 1.21  | 0.21          | 0.59  | 422.40        | 70.50 | 459.38          | 70.97 | 99.84%   | 99.99%  |
| D0-2        | 2.15            | 1.77  | 0.52          | 0.37  | 1271.55       | 64.14 | 1281.96         | 65.32 | 99.90%   | 99.99%  |
| D0-3        | 0.79            | 1.72  | 0.76          | 0.43  | 522.22        | 85.00 | 667.79          | 81.74 | 99.77%   | 99.99%  |
| D3-1        | 3.03            | 0.00  | 0.13          | 1.00  | 705.78        | 6.33  | 712.14          | 8.00  | 99.71%   | 99.99%  |
| D3-2        | 2.74            | 0.41  | 0.14          | 0.81  | 465.02        | 10.00 | 474.31          | 12.75 | 99.87%   | 99.99%  |
| D3-3        | 1.29            | 0.36  | 0.65          | 0.80  | 852.87        | 13.00 | 862.53          | 15.44 | 99.80%   | 99.99%  |
| D5-1        | 3.00            | 0.88  | 0.09          | 0.72  | 573.16        | 68.00 | 593.76          | 68.00 | 99.80%   | 100.00% |
| D5-2        | 0.31            | 0.52  | 0.92          | 0.82  | 278.85        | 71.20 | 270.28          | 69.89 | 99.89%   | 99.99%  |
| D5-3        | 1.83            | 0.93  | 0.29          | 0.51  | 363.73        | 88.43 | 374.00          | 88.56 | 99.84%   | 99.99%  |
| D20-1       | 3.09            | 0.31  | 0.09          | 0.88  | 421.87        | 44.20 | 415.54          | 44.73 | 99.91%   | 99.99%  |
| D20-2       | 2.91            | 0.19  | 0.12          | 0.94  | 405.65        | 41.00 | 410.43          | 41.71 | 99.90%   | 99.98%  |
| D20-3       | 1.97            | 0.75  | 0.26          | 0.58  | 312.90        | 37.00 | 402.92          | 36.85 | 99.83%   | 99.97%  |
| D35-1       | 0.60            | 1.15  | 0.71          | 0.59  | 109.43        | 75.50 | 200.56          | 72.57 | 99.91%   | 99.99%  |
| D35-2       | 3.06            | 1.99  | 0.10          | 0.24  | 417.33        | 59.00 | 418.98          | 59.00 | 99.87%   | 100.00% |
| D35-3       | 2.57            | 2.21  | 0.14          | 0.21  | 336.68        | 64.00 | 353.40          | 62.97 | 99.87%   | 99.99%  |
