# Supplementary material for: Succession and Diversity of Microbial Flora during the Fermentation of Douchi and Their Effects on the Formation of Characteristic Aroma
Source: MDPI journal article supplement (doi:10.3390/foods12020329), 2023-01-10
Supplement: s1 [file s1]

**Table S3.** Aroma-active compounds identified by OAVs in Yangfan *Douchi* samples.

| No. | Volatile compound                     | Threshold value (mg kg <sup>-1</sup> ) | OAV       | Smell characteristics              |
|-----|---------------------------------------|----------------------------------------|-----------|------------------------------------|
| 8   | 1-Octen-3-ol                          | 0.01                                   | 25.2      | Mushroom fragrance                 |
| 13  | 1-Hexanol                             | 0.034                                  | 3.47      | Beany, fruity                      |
| 16  | 3-Octanol                             | 0.018                                  | 1.77      | earthy, mushroom, musty, fermented |
| 19  | Phenylethyl Alcohol                   | 0.012-0.021                            | 2.08-3.64 | Fragrance, floral                  |
| 24  | Decanal                               | 0.0001                                 | 29.9      | floral                             |
| 25  | Nonanal                               | 0.0031                                 | 4.88      | Flower, orange, grassy             |
| 27  | 2-Nonenal, (E)-                       | 0.00019                                | 9.842     | fatty                              |
| 29  | Benzeneacetaldehyde                   | 0.0063                                 | 6.01      | Fermented, earthy                  |
| 34  | 3-Octanone                            | 0.0013                                 | 45.42     | Mildew, fragrance, mushrooms       |
| 36  | 1-Octen-3-one                         | 0.00012                                | 42.583    | Mushroom                           |
| 50  | Butanoic acid, 2-methyl-, ethyl ester | 0.000013                               | 1353.08   | Fruity                             |
| 57  | Benzoic acid, ethyl ester             | 0.053                                  | 1.76      | fruity, medicinal                  |
| 58  | Benzeneacetic acid, ethyl ester       | 0.0033                                 | 3.15      | balsam, cocoa                      |
| 73  | Acetic acid                           | 0.013-0.15                             | 1.2       | Sour, pungent                      |
| 74  | Phenol, 2-methoxy-                    | 0.0025                                 | 17.2      | Smoky                              |
| 75  | Phenol, 4-ethyl-                      | 0.042                                  | 4.22      | Smoky, savory                      |
| 76  | Phenol                                | 0.021                                  | 3         | Rubbery, plastic-like              |
