# Supplementary material for: Succession and Diversity of Microbial Flora during the Fermentation of Douchi and Their Effects on the Formation of Characteristic Aroma
Source: MDPI journal article supplement (doi:10.3390/foods12020329), 2023-01-10
Supplement: s1 [file s1]

**Table S2** Quantitative comparison of volatile compounds (expressed in  $\mu\text{g kg}^{-1}$ ) in Yangfan *Douchi* during the fermentation process.

| No.      | Volatile compound                | Content (µg kg-1) |               |              |               |               | RI   | LRI  | Identification |
|----------|----------------------------------|-------------------|---------------|--------------|---------------|---------------|------|------|----------------|
|          |                                  | D0                | D3            | D5           | D20           | D35           |      |      |                |
| Alcohols |                                  |                   |               |              |               |               |      |      |                |
| 1        | Ethanol                          | ND                | 226.37±31.42a | ND           | 13.78±2.74b   | ND            | 427  | 812  | MS, RI, LRI    |
| 2        | 1-Butanol                        | 8.09±1.18a        | ND            | ND           | 6.25±10.82a   | ND            | 659  | 1062 | MS, RI, LRI    |
| 3        | 1-Butanol, 3-methyl-             | ND                | 152.97±68.48a | 25.01±1.9b   | 84.01±14.34b  | 77.49±22.38b  | 736  | 1137 | MS, RI, LRI    |
| 4        | Levomenthol                      | 3.1±1.03          | ND            | ND           | ND            | ND            | 1175 | 1140 | MS, RI, LRI    |
| 5        | 1-Butanol, 2-methyl-             | 20.08±1.94        | ND            | ND           | ND            | ND            | 739  | 1127 | MS, RI, LRI    |
| 6        | 1-Pentanol                       | 4.71±2.73         | ND            | ND           | ND            | ND            | 765  | 1172 | MS, RI, LRI    |
| 7        | Cyclohexanol, 2,4-dime-<br>thyl- | ND                | ND            | ND           | 4.46±3.35     | ND            | 1032 | 1192 | MS, RI, LRI    |
| 8        | 1-Octen-3-ol                     | 84.46±22.9c       | 170.62±42.54b | 90.57±14.39c | 188.99±18.09b | 251.96±34.35a | 980  | 1386 | MS, RI, LRI    |
| 9        | Cyclohexanol, 2,3-dime-<br>thyl- | 0.77±0.53         | ND            | ND           | ND            | ND            | -    | 1418 | MS, RI, LRI    |
| 10       | 4-Ethylcyclohexanol              | ND                | ND            | ND           | ND            | 0.55±0.4      | 1003 | 1440 | MS, RI, LRI    |
| 11       | 1-Hexanol, 2-ethyl-              | ND                | 15.95±4.49    | ND           | ND            | ND            | 1030 | 1454 | MS, RI, LRI    |
| 12       | 1-Octyn-3-ol                     | ND                | ND            | ND           | ND            | 8.93±0.54     | -    | 1216 | MS, RI, LRI    |
| 13       | 1-Hexanol                        | 118.11±32.38a     | 14.44±2.23b   | 3.41±1.1b    | 5.46±0.93b    | 4.5±0.58b     | 868  | 1289 | MS, RI, LRI    |
| 14       | 2-Hexen-1-ol, (Z)-               | 0.06±0.06         | ND            | ND           | ND            | ND            | 868  | 1561 | MS, RI, LRI    |
| 15       | 2,3-Butanediol                   | ND                | 4.12±1.94     | ND           | ND            | ND            | 788  | 1560 | MS, RI, LRI    |
| 16       | 3-Octanol                        | 7.4±1.29c         | 21.43±3.64b   | 10.91±1.95c  | 35.26±2.54a   | 31.78±4.4a    | 994  | 1339 | MS, RI, LRI    |
| 17       | 1-Nonanol                        | 3.57±1.1a         | ND            | ND           | 0.97±1.68b    | 3.59±0.93a    | 1173 | 1539 | MS, RI, LRI    |
| 18       | Benzyl alcohol                   | 3.46±1.52a        | 1.3±1.14b     | 0.36±0.63b   | ND            | ND            | 1036 | 1970 | MS, RI, LRI    |

|                  |                                         |                         |                          |                          |                         |                           |      |      |             |
|------------------|-----------------------------------------|-------------------------|--------------------------|--------------------------|-------------------------|---------------------------|------|------|-------------|
| 19               | Phenylethyl Alcohol                     | ND                      | 48.39±10.12a             | ND                       | 44.16±1.93a             | 43.66±3.57a               | 1116 | 2024 | MS, RI, LRI |
| 20               | β-Ethylphenethyl alcohol                | ND                      | ND                       | ND                       | 3.47±2.7                | ND                        | 1261 | 2123 | MS, RI, LRI |
| <b>Aldehydes</b> |                                         |                         |                          |                          |                         |                           |      |      |             |
| 21               | Octanal                                 | ND                      | ND                       | ND                       | ND                      | 5.49±2.91                 | 1003 | 1199 | MS, RI, LRI |
| 22               | 2-Heptenal, (Z)-                        | ND                      | ND                       | 2.82±0.12 <sup>b</sup>   | ND                      | 7.98±0.57 <sup>a</sup>    | 958  | 1236 | MS, RI, LRI |
| 23               | Hexanal                                 | 22.14±3.13 <sup>a</sup> | 7.53±7.12 <sup>bc</sup>  | 15.44±3.83 <sup>ab</sup> | 4.7±0.54 <sup>c</sup>   | 12.4±5.4 <sup>bc</sup>    | 800  | 927  | MS, RI, LRI |
| 24               | Decanal                                 | 3.12±3.11 <sup>a</sup>  | ND                       | 2.44±0.41 <sup>a</sup>   | 7.47±4.35 <sup>a</sup>  | 2.99±2.64 <sup>a</sup>    | 1206 | 1453 | MS, RI, LRI |
| 25               | Nonanal                                 | 15.12±5.14 <sup>a</sup> | 4.31±3.41 <sup>c</sup>   | 10.5±1.38 <sup>ab</sup>  | 7.39±1.91 <sup>bc</sup> | 9.96±2.25 <sup>abc</sup>  | 1104 | 1323 | MS, RI, LRI |
| 26               | Benzaldehyde                            | 7.44±6.16 <sup>b</sup>  | 39.38±13.56 <sup>a</sup> | 14.76±1.23 <sup>b</sup>  | 49.52±1.99 <sup>a</sup> | 41.16±6.4 <sup>a</sup>    | 962  | 1465 | MS, RI, LRI |
| 27               | 2-Nonenal, (E)-                         | 2.26±2.01 <sup>a</sup>  | ND                       | 0.12±0.21 <sup>a</sup>   | 0.96±1.66 <sup>a</sup>  | 1.87±3.25 <sup>a</sup>    | 1162 | 1493 | MS, RI, LRI |
| 28               | 2-Octenal, (E)-                         | ND                      | ND                       | 2.9±0.51                 | ND                      | ND                        | 1060 | 1358 | MS, RI, LRI |
| 29               | Benzeneacetaldehyde                     | ND                      | 30.76±5.45 <sup>ab</sup> | 15.97±2.44 <sup>c</sup>  | 28.08±6.18 <sup>b</sup> | 37.85±2.76 <sup>a</sup>   | 1045 | 1619 | MS, RI, LRI |
| 30               | Benzeneacetaldehyde, α-ethyl-           | ND                      | ND                       | ND                       | 12.01±1.87              | ND                        | -    | 1693 | MS, RI, LRI |
| 31               | Benzaldehyde, 4-methoxy-                | 0.12±0.11 <sup>a</sup>  | ND                       | 0.43±0.38 <sup>a</sup>   | 0.88±0.48 <sup>a</sup>  | 3.19±3.84 <sup>a</sup>    | 1250 | 2164 | MS, RI, LRI |
| 32               | Benzeneacetaldehyde, α-ethylidene-      | ND                      | ND                       | ND                       | 32.61±6.47 <sup>a</sup> | 12.55±1.33 <sup>b</sup>   | 1279 | 2035 | MS, RI, LRI |
| <b>Ketones</b>   |                                         |                         |                          |                          |                         |                           |      |      |             |
| 33               | 3-Heptanone, 4-methyl-                  | 3.14±1.67               | ND                       | ND                       | ND                      | ND                        | -    | 827  | MS, RI, LRI |
| 34               | 3-Octanone                              | ND                      | ND                       | 11.02±0.03 <sup>c</sup>  | 50.88±0.53 <sup>b</sup> | 59.04±5.99 <sup>a</sup>   | 986  | 1156 | MS, RI, LRI |
| 35               | 2-Octanone                              | 6.17±0.59               | ND                       | ND                       | ND                      | ND                        | 990  | 1201 | MS, RI, LRI |
| 36               | 1-Octen-3-one                           | ND                      | ND                       | 5.02±0.36 <sup>a</sup>   | 5.11±3.28 <sup>a</sup>  | ND                        | 979  | 1220 | MS, RI, LRI |
| 37               | 2,3-Octanedione                         | ND                      | ND                       | ND                       | 7.04±1.8                | ND                        | 984  | 1240 | MS, RI, LRI |
| 38               | 3-Octanone, 2-methyl-                   | ND                      | ND                       | 6.55±1.25 <sup>ab</sup>  | ND                      | 7.82±7.7 <sup>a</sup>     | 985  | 1243 | MS, RI, LRI |
| 39               | Ethanone, 1-(2-hydroxy-5-methylphenyl)- | ND                      | ND                       | ND                       | 80.63±7.07 <sup>b</sup> | 109.58±14.59 <sup>a</sup> | 1316 | 2390 | MS, RI, LRI |
| 40               | 4-Hydroxy-2-methylacetophenone          | ND                      | 4.88±1.45                | ND                       | ND                      | ND                        | -    | 2395 | MS, RI, LRI |

| <b>Alkenes</b> |                                           |                         |                          |                         |                          |                          |      |      |             |
|----------------|-------------------------------------------|-------------------------|--------------------------|-------------------------|--------------------------|--------------------------|------|------|-------------|
| 41             | Undecane                                  | 16.58±1.24 <sup>a</sup> | 10.81±6.74 <sup>a</sup>  | 8.97±0.85 <sup>a</sup>  | 15.67±12.74 <sup>a</sup> | 23.73±9.51 <sup>a</sup>  | 1100 | 1001 | MS, RI, LRI |
| 42             | Dodecane                                  | 2.27±2.07               | ND                       | ND                      | ND                       | ND                       | 1200 | 1112 | MS, RI, LRI |
| 43             | Hexadecane                                | 9.54±5.88               | ND                       | ND                      | ND                       | ND                       | 1600 | 1163 | MS, RI, LRI |
| 44             | Decane, 3,7-dimethyl-                     | 3.56±2.89               | ND                       | ND                      | ND                       | ND                       | 1125 | 1220 | MS, RI, LRI |
| 45             | Dodecane, 2,6,10-trime-<br>thyl-          | 0.46±0.19               | ND                       | ND                      | ND                       | ND                       | 1366 | 1385 | MS, RI, LRI |
| 46             | Nonadecane                                | 1.87±1.97               | ND                       | ND                      | ND                       | ND                       | 1900 | 1393 | MS, RI, LRI |
| 47             | Pentadecane                               | ND                      | ND                       | ND                      | ND                       | 13.14±2.38               | 1500 | 1459 | MS, RI, LRI |
| <b>Olefin</b>  |                                           |                         |                          |                         |                          |                          |      |      |             |
| 48             | Styrene                                   | ND                      | ND                       | ND                      | 21.65±0.9 <sup>b</sup>   | 43.3±2.83 <sup>a</sup>   | 893  | 1150 | MS, RI, LRI |
| 49             | Caryophyllene                             | ND                      | ND                       | 11.55±6.37 <sup>a</sup> | 8.68±0.39 <sup>a</sup>   | 10.94±3.71 <sup>a</sup>  | 1419 | 1556 | MS, RI, LRI |
| <b>Esters</b>  |                                           |                         |                          |                         |                          |                          |      |      |             |
| 50             | Butanoic acid, 2-methyl-,<br>ethyl ester  | ND                      | ND                       | ND                      | ND                       | 17.59±3.16               | 849  | 882  | MS, RI, LRI |
| 51             | Carbonic acid, decyl propyl<br>ester      | 0.46±0.66               | ND                       | ND                      | ND                       | ND                       | -    | 1244 | MS, RI, LRI |
| 52             | Sulfurous acid, hexyl un-<br>decyl ester  | 0.11±0.17               | ND                       | ND                      | ND                       | ND                       | -    | 1314 | MS, RI, LRI |
| 53             | Benzoic acid, methyl ester                | ND                      | ND                       | ND                      | ND                       | 2.45±1.84                | 1171 | 1599 | MS, RI, LRI |
| 54             | Tetradecanoic acid, ethyl<br>ester        | ND                      | 6.74±7.44 <sup>c</sup>   | ND                      | 13.3±1.57 <sup>b</sup>   | 44.7±0.59 <sup>a</sup>   | 1794 | 2229 | MS, RI, LRI |
| 55             | Pentadecanoic acid, ethyl<br>ester        | ND                      | ND                       | ND                      | ND                       | 5.17±1.92                | 1894 | 2364 | MS, RI, LRI |
| 56             | Sulfurous acid, 2-propyl<br>undecyl ester | 0.18±0.25               | ND                       | ND                      | ND                       | ND                       | -    | 1648 | MS, RI, LRI |
| 57             | Benzoic acid, ethyl ester                 | ND                      | 31.08±23.01 <sup>b</sup> | ND                      | 43.47±6.4 <sup>b</sup>   | 93.18±14.96 <sup>a</sup> | 1171 | 1656 | MS, RI, LRI |
| 58             | Benzeneacetic acid, ethyl                 | ND                      | ND                       | ND                      | 2.34±0.75 <sup>b</sup>   | 10.38±1.83 <sup>a</sup>  | 1246 | 1822 | MS, RI, LRI |

|                           |                                                      |                          |                          |                         |                            |                           |      |      |             |
|---------------------------|------------------------------------------------------|--------------------------|--------------------------|-------------------------|----------------------------|---------------------------|------|------|-------------|
|                           | ester                                                |                          |                          |                         |                            |                           |      |      |             |
| 59                        | Acetic acid, 2-phenylethyl ester                     | ND                       | 9.08±2.44                | ND                      | ND                         | ND                        | 1258 | 1870 | MS, RI, LRI |
| 60                        | Phenol, 3-methyl-5-(1-methylethyl)-, methylcarbamate | 0.58±0.53 <sup>b</sup>   | ND                       | 5.66±1.68 <sup>a</sup>  | ND                         | ND                        | 1687 | 2393 | MS, RI, LRI |
| 61                        | Hexadecanoic acid, methyl ester                      | ND                       | 18.19±7.16 <sup>c</sup>  | 3.38±0.95 <sup>d</sup>  | 28.99±7.84 <sup>b</sup>    | 50.46±1.29 <sup>a</sup>   | 1926 | 2439 | MS, RI, LRI |
| 62                        | Hexadecanoic acid, ethyl ester                       | ND                       | 98.56±5.33 <sup>c</sup>  | 3.74±1.07 <sup>d</sup>  | 152.58±5.34 <sup>b</sup>   | 595.47±63.39 <sup>a</sup> | 1993 | 2493 | MS, RI, LRI |
| 63                        | Linoleic acid ethyl ester                            | ND                       | 66.05±1.2 <sup>b</sup>   | ND                      | 102.73±1.41 <sup>b</sup>   | 345.39±49.75 <sup>a</sup> | 2162 | 2860 | MS, RI, LRI |
| 64                        | Ethyl Oleate                                         | ND                       | 26.42±2.31 <sup>b</sup>  | ND                      | 34.09±6.87 <sup>b</sup>    | 189.39±24.39 <sup>a</sup> | 2173 | 2780 | MS, RI, LRI |
| <b>Benzene derivative</b> |                                                      |                          |                          |                         |                            |                           |      |      |             |
| 65                        | Ethylbenzene                                         | 2.44±0.67 <sup>b</sup>   | ND                       | ND                      | ND                         | 29.04±3.03 <sup>a</sup>   | 855  | 1024 | MS, RI, LRI |
| 66                        | p-Xylene                                             | ND                       | 42.45±13.19 <sup>b</sup> | 23.27±1.08 <sup>c</sup> | 39.41±14.82 <sup>bc</sup>  | 63.59±8.41 <sup>a</sup>   | 865  | 1033 | MS, RI, LRI |
| 67                        | Benzene, 1,3-dimethyl-                               | 35.08±10.97 <sup>a</sup> | ND                       | ND                      | 23.01±39.86 <sup>a</sup>   | ND                        | 866  | 1038 | MS, RI, LRI |
| 68                        | Benzene, 1-ethyl-2-methyl-                           | ND                       | ND                       | ND                      | 8.14±1.67 <sup>b</sup>     | 12.79±3.11 <sup>a</sup>   | 970  | 1105 | MS, RI, LRI |
| 69                        | Mesitylene                                           | ND                       | ND                       | 9.33±0.42 <sup>a</sup>  | 5.69±2.79 <sup>b</sup>     | ND                        | 972  | 1175 | MS, RI, LRI |
| 70                        | Benzene, 1,2,3-trimethyl-                            | 4.9±1.65 <sup>b</sup>    | ND                       | ND                      | ND                         | 24.18±8.48 <sup>a</sup>   | 1013 | 1185 | MS, RI, LRI |
| 71                        | Benzene, 1,3-bis(1,1-dimethylethyl)-                 | 2.25±0.77 <sup>c</sup>   | 5.39±0.39 <sup>c</sup>   | 2.18±0.36 <sup>c</sup>  | 73.33±5.35 <sup>a</sup>    | 16.82±6.72 <sup>b</sup>   | 1247 | 1361 | MS, RI, LRI |
| 72                        | Benzene, propyl-                                     | ND                       | 15.58±8.01               | ND                      | ND                         | 2.13±3.68                 | 953  | 1633 | MS, RI, LRI |
| <b>Acids</b>              |                                                      |                          |                          |                         |                            |                           |      |      |             |
| 73                        | Acetic acid                                          | ND                       | ND                       | 1.64±2.83 <sup>b</sup>  | 2.72±4.71 <sup>b</sup>     | 15.61±1.27 <sup>a</sup>   | 610  | 1392 | MS, RI, LRI |
| <b>Phenols</b>            |                                                      |                          |                          |                         |                            |                           |      |      |             |
| 74                        | Phenol, 2-methoxy-                                   | ND                       | ND                       | ND                      | 429.98±126.67 <sup>a</sup> | 324.66±25.75 <sup>b</sup> | 1090 | 1935 | MS, RI, LRI |
| 75                        | Phenol, 4-ethyl-                                     | ND                       | 5.4±2.61 <sup>c</sup>    | 1.41±0.31 <sup>c</sup>  | 177.16±19.55 <sup>a</sup>  | 98.96±8.04 <sup>b</sup>   | 1169 | 2370 | MS, RI, LRI |
| 76                        | Phenol                                               | ND                       | ND                       | ND                      | 55.19±13.23 <sup>a</sup>   | 62.93±2.49 <sup>a</sup>   | 980  | 2150 | MS, RI, LRI |

|                    |                                   |                          |                         |                         |                           |                          |      |      |             |
|--------------------|-----------------------------------|--------------------------|-------------------------|-------------------------|---------------------------|--------------------------|------|------|-------------|
| 77                 | Phenol, 4-ethyl-2-methoxy-        | ND                       | ND                      | ND                      | 49.96±5.49 <sup>a</sup>   | 24.79±2.29 <sup>b</sup>  | 1282 | 2181 | MS, RI, LRI |
| 78                 | 2,4-Di-tert-butylphenol           | 11.07±3.75 <sup>bc</sup> | 40.12±9.91 <sup>a</sup> | 3.74±0.72 <sup>c</sup>  | 30.63±22.03 <sup>ab</sup> | 17.39±4.81 <sup>bc</sup> | 1519 | 2546 | MS, RI, LRI |
| 79                 | Maltol                            | 10.32±4.18 <sup>a</sup>  | 5.53±6.38 <sup>ab</sup> | ND                      | ND                        | ND                       | 1110 | 2096 | MS, RI, LRI |
| <b>Furan(one)s</b> |                                   |                          |                         |                         |                           |                          |      |      |             |
| 80                 | 2(3H)-Furanone, dihydro-5-pentyl- | 1.42±1.3                 | ND                      | ND                      | ND                        | ND                       | 1363 | 2178 | MS, RI, LRI |
| 81                 | Benzofuran, 2,3-dihydro-          | ND                       | 6.19±3.24 <sup>c</sup>  | 11.48±3.56 <sup>c</sup> | 94.51±1.79 <sup>b</sup>   | 112.54±4.26 <sup>a</sup> | 1224 | 2629 | MS, RI, LRI |
| <b>Others</b>      |                                   |                          |                         |                         |                           |                          |      |      |             |
| 82                 | Heptanamide, 4-ethyl-5-methyl-    | 0.16±0.15                | ND                      | ND                      | ND                        | ND                       | -    | 1824 | MS, RI, LRI |
| 83                 | 12-Crown-4                        | 0.43±0.43                | ND                      | ND                      | ND                        | ND                       | -    | 2787 | MS, RI, LRI |

ND: not detected.

Calculated retention index (RI) on DB-WAX column.

Identification methods: MS, mass spectrometry; RI, retention indices; LRI, linear retention indices.
